# Supplementary material for: Chitosan functionalized nitrogen-doped carbon dot nanocomposites: a turn-on sensor for fluoride detection
Source: Royal Society of Chemistry journal article supplement (doi:10.1039/d5ra04745e), 2025-01-01
Supplement: d5ra04745e1.pdf [file d5ra04745e1.pdf]

# Chitosan functionalized nitrogen-doped carbon dots nanocomposites: A turn-on sensor for fluoride detection

Sujal <sup>a</sup>, Raj Singh <sup>a</sup>, Suman Swami <sup>a\*</sup>, and Shikha Bhogal <sup>b\*</sup>

<sup>a</sup> Department of Chemistry, Chandigarh University, Gharaun, Mohali, Punjab, India-140413

<sup>b</sup> Virginia Tech-TIET Center of Excellence in Emerging Materials, Thapar Institute of Engineering & Technology, Patiala – 147004, India

\*Corresponding author: [sumanswami1994@gmail.com](mailto:sumanswami1994@gmail.com) (S.S.); [shikha.bhogal@thapar.edu](mailto:shikha.bhogal@thapar.edu) (S.B.)

**Table S1.** List of chemicals and their make required for the synthesis.

| Order | Chemicals Name                      | Make          |
|-------|-------------------------------------|---------------|
| 1.    | Ethylene diaminetetracetic acid     | Sigma-Aldrich |
| 2.    | Urea                                | Loba Chemie   |
| 3.    | Chitosan                            | Loba Chemie   |
| 4.    | Tetrabutylammonium fluoride hydrate | Sigma-Aldrich |

**Table S2.** Details of the instruments applied for the characterization and analysis of N-CDs and N-CDs@C

| Order | Technique                                 | Model                                      |
|-------|-------------------------------------------|--------------------------------------------|
| 1.    | Fourier transform infrared (FTIR) spectra | PerkinElmer Spectrum Two FTIR Spectrometer |
| 2.    | X-ray photoelectron spectroscopy          | Thermofisher scientific Nexus base         |

(XPS)

XPS

- |    |                                                           |                                                            |
|----|-----------------------------------------------------------|------------------------------------------------------------|
| 3. | Brunauer-Emmett-Teller (BET) surface area analyzer        | Autosorb iQ Station 2 system, Quntachrome Instruments, USA |
| 4. | High- resolution transmission electron microscopy (HRTEM) | JEOL JEM 2100 Plus, JEOL, Japan                            |
| 5. | Energy dispersive X-ray spectra (EDS)                     | JEM 2100 plus, JEOL, Japan                                 |
| 6. | Fluorescence Spectra                                      | Shimadzu Fluorescence RF-6000 equipped with a quartz cell  |
| 7. | Life time measuring system                                | Delta Flex TCSPC system (Horiba)                           |
- 

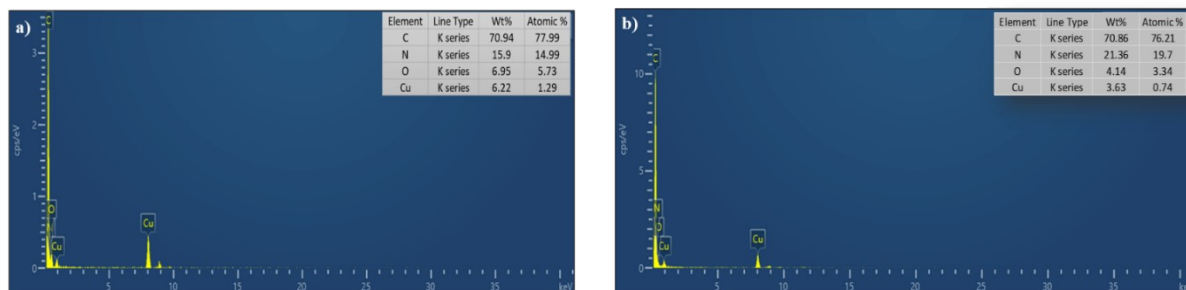

**Figure S1. EDS spectra of the synthesized materials: a) N-CDs and b) N-CDs@C**

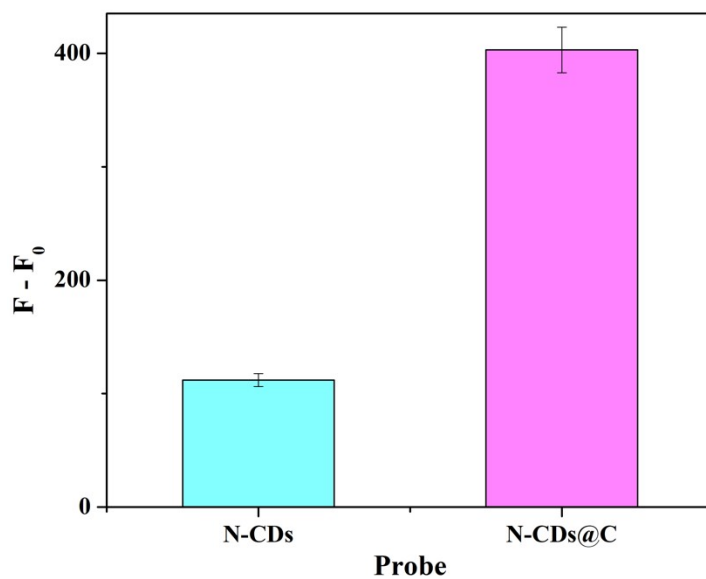

**Figure S2. Comparative analysis of the sensing performance of N-CDs and N-CDs@C towards  $F^-$  ion**

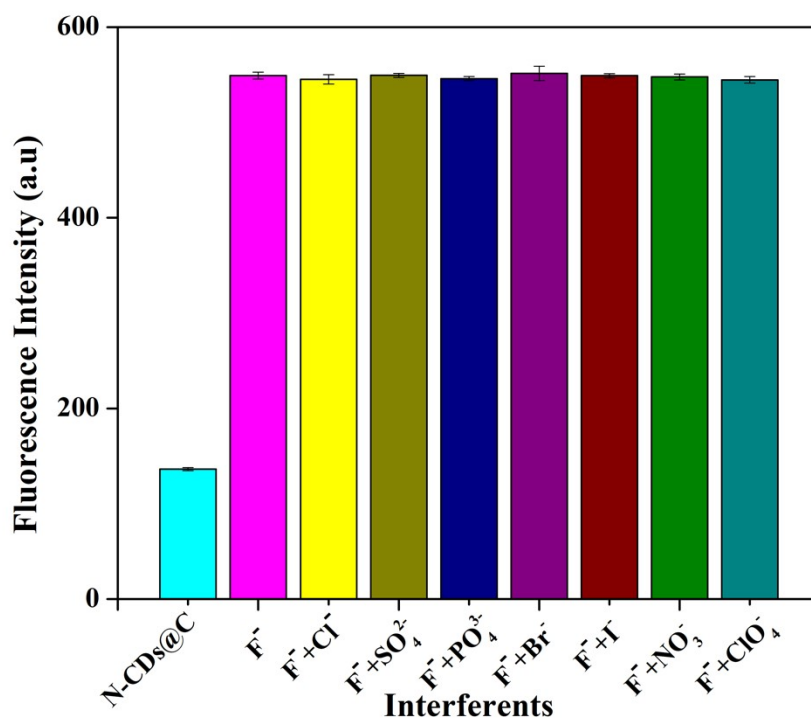

**Figure S3. Fluorescence emission intensity of N-CDs@C in the presence of  $F^-$  and other interfering anions at a 1:1 ratio concentration**

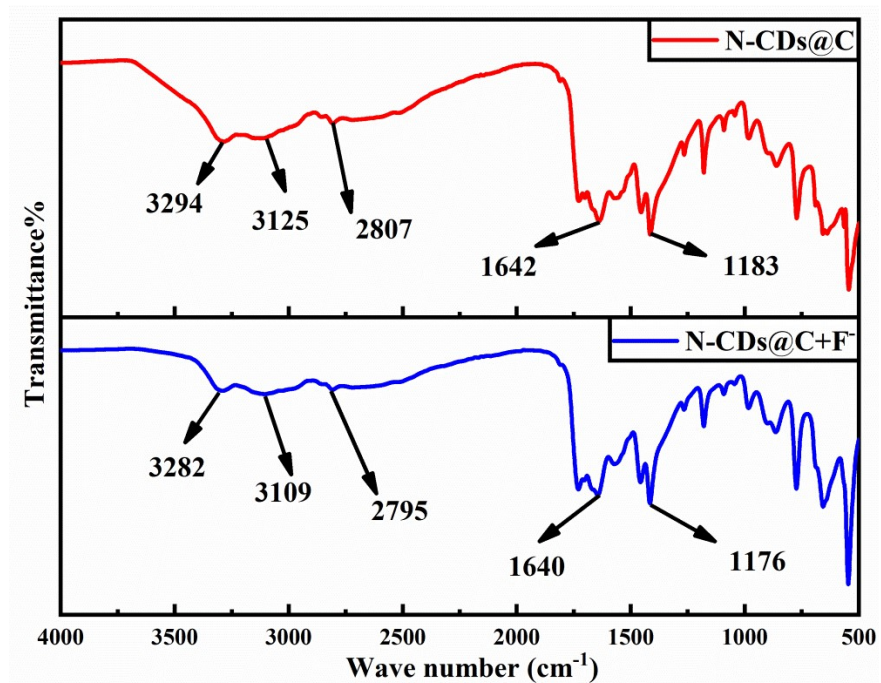

**Figure S4. Comparison of FTIR spectra between N-CDs@C before and after binding with  $\text{F}^-$**
